# Supplementary material for: FKRP-dependent glycosylation of fibronectin regulates muscle pathology in muscular dystrophy
Source: PubMed Central journal article supplement (PMC8134429; doi:10.1038/s41467-021-23217-6), 2021-05-19
Supplement: 41467_2021_23217_MOESM2_ESM.pdf [file 41467_2021_23217_MOESM2_ESM.pdf]

1 **Supplementary Data and Methods.**  
 2 **Supplementary Figures and Legends.**  
 3

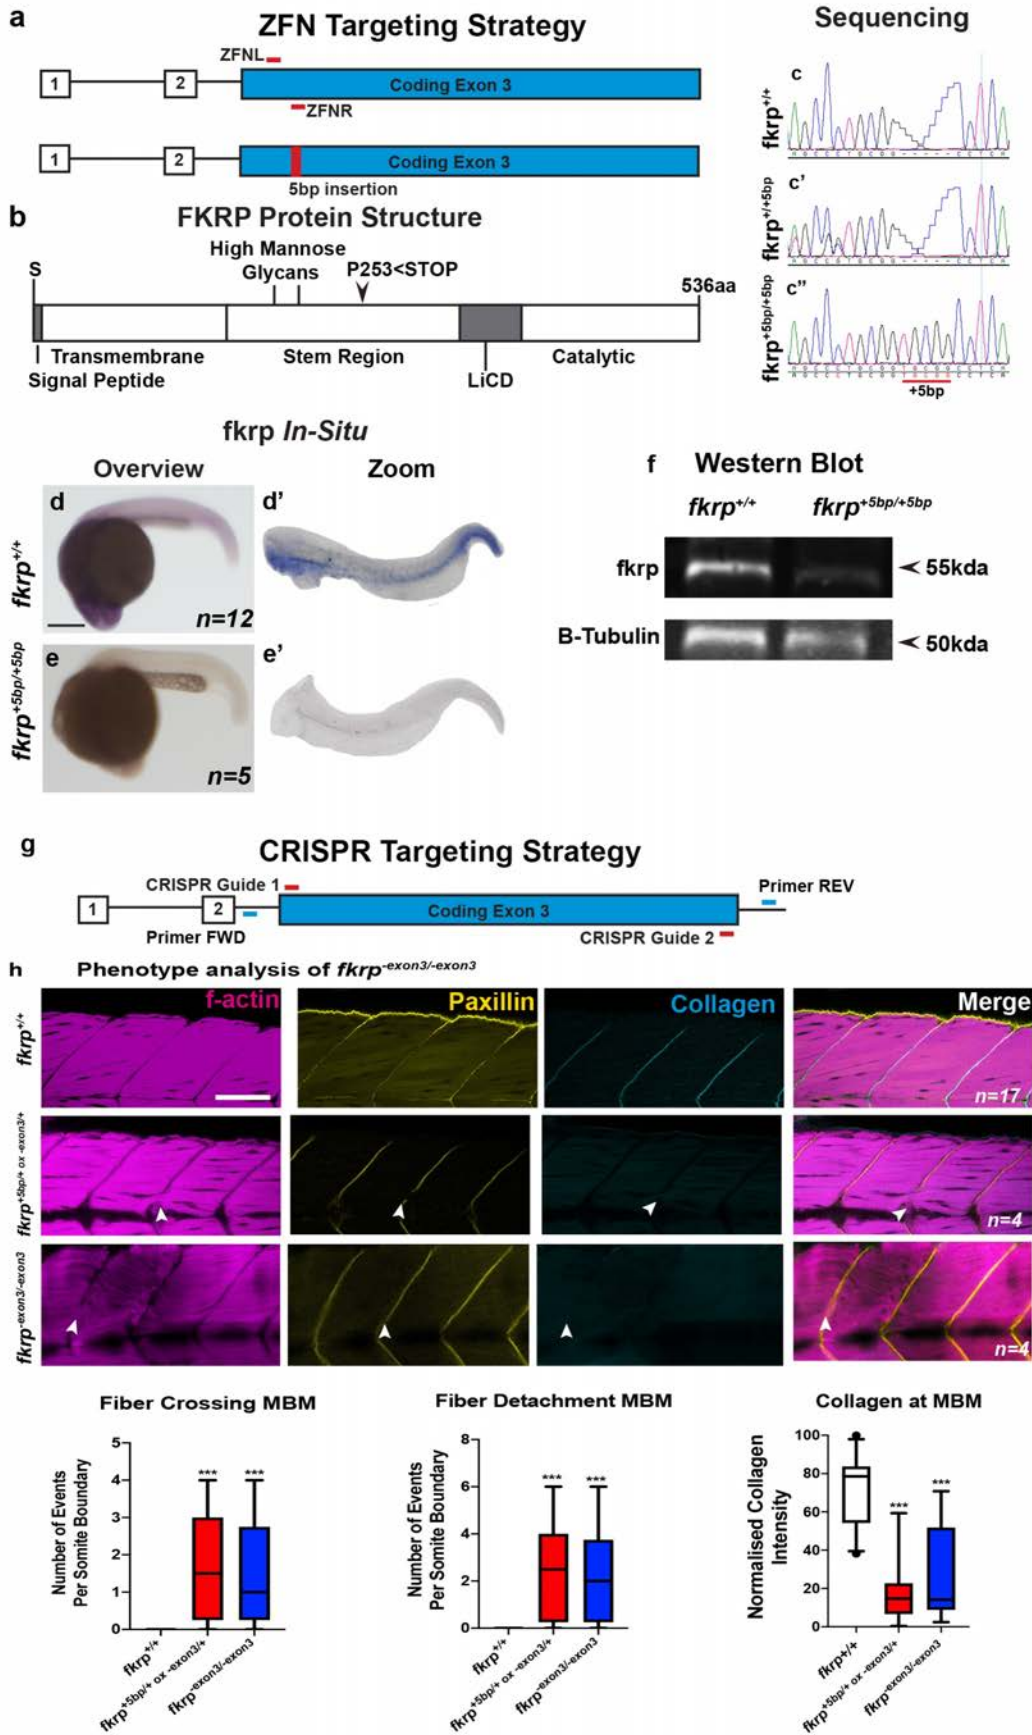

5 **Supplementary Figure 1: Generation of a zebrafish *fkrp* loss of function model; *fkrp*<sup>-/-</sup>**  
6 **mutant alleles. a**, Zinc Finger Nuclease (ZFN) targeting strategy to the start of the single  
7 coding exon (exon 3) of the zebrafish *fkrp* locus and resultant 5bp insertion. **b**, FKRP protein  
8 with position of premature stop codon at P253<STOP in the stem region of the protein, a region  
9 important for oligomerisation of glycosyltransferases, which would, if translated, produce a  
10 protein without an LiCD catalytic domain and thus would be predicted to contain no  
11 glycosyltransferase function. **c-c''**, Chromatograms of the 5bp insertion region aligned for **c**,  
12 *fkrp*<sup>+/+</sup> sibling, **c'**, *fkrp*<sup>+/-</sup> sibling and **c''**, *fkrp*<sup>-/-</sup>. **d-e**, 1dpf whole mount *in situ* hybridization  
13 (WISH) of *fkrp* in **d-d'**, *fkrp*<sup>+/+</sup> sibling and **e-e'**, *fkrp*<sup>-/-</sup> mutant embryos. The reduction of  
14 detected mRNA expression suggests that the zinc finger nuclease mutation results in the  
15 induction of a significant level of nonsense mediated decay. **f**, Western Blot analysis of lysate  
16 from 30 zebrafish per genotype, 30µg protein lysate in each lane, stained for antibodies against  
17 FKRP and Tubulin as a loading control, n=3. This analysis reveals the zinc finger induced  
18 allele, results in a loss of FKRP protein. **g**, Schematic of the second, *fkrp* CRISPR-induced,  
19 allele designed to remove the entire coding region of *fkrp* gene which is contained entirely in  
20 exon 3. Location of the crisper mRNA guides marked in red on the upper "blue exon"  
21 schematic. The location of the PCR genotyping flanking primers used in **h** to detect the removal  
22 of the entirety of exon three are marked in blue on the schematic. **h**, Phenotype analyses of  
23 heteroallelic cross between the two induced alleles results in a similar phenotype to either allele  
24 alone. The phenotype of the of the heteroallelic incross and the *fkrp*-*exon3*/*-exon3* crispr allele  
25 share the phenotype observed in the zfn fish line, namely fiber detachment and fiber crossing  
26 of the myoseptal boundary. Analyses included f-actin, collagen and paxillin stain at 5dpf, arrow  
27 points to fibre crossing myoseptal boundaries scale bar =100µm. **i-j**, Fibre crossing counts and  
28 fibre detachment per myosepta (MBM), respectively. **k**, collagen intensity normalised to  
29 maximum collagen in wild type controls, analysed in Fiji. **i-k**, box and whisker plot, middle  
30 line= mean, box= 95% confidence interval, error bars= SEM, using two-way ANOVA multiple

31 comparison assuming non-parametric data, significance of, \*\*\*( $p < 0.0001$ ). The heteroallelic  
32 incross and the *fkrp-exon3/-exon3* crispr allele were both observed to have a significant  
33 drop \*\*\*( $p < 0.0001$ ) in collagen at their myoseptal boundaries, phenocopying the *fkrp* zfn  
34 induced line described in the main text, [three fish were examined from three repeats](#).

35

### DGC Wholemout Staining at 1dpf

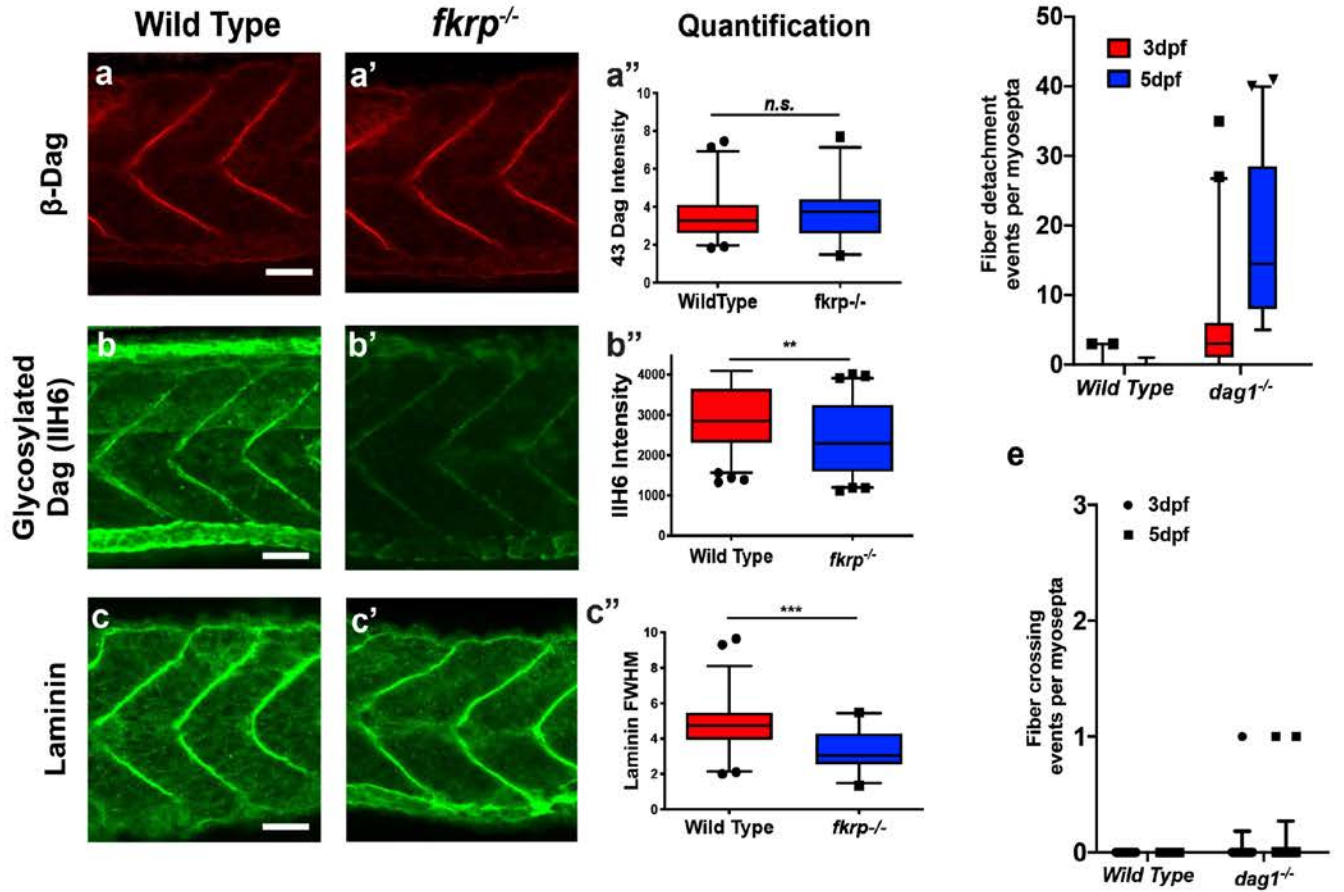

### Evans Blue Dye Injection

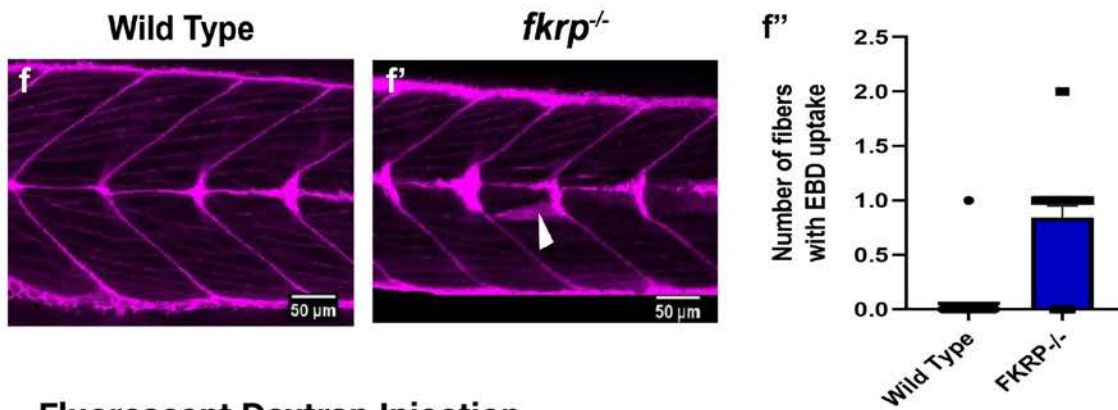

### Fluorescent Dextran Injection

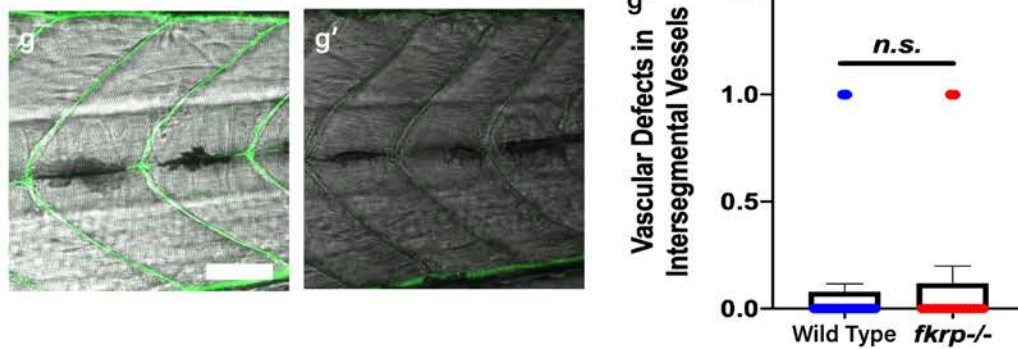

37 **Supplementary Figure 2: *fkrp*<sup>-/-</sup> mutant fish recapitulate patient DGC and fibre loss**  
38 **phenotypes.** To evaluate the Dystrophin associated glycoprotein complex (DGC) in the *fkrp*<sup>-/-</sup>  
39 mutant fish, whole mount immunohistochemistry was carried out at 1dpf for core DGC  
40 components (a-c scale bar= 30µm). **a-a''**, Immunohistochemistry against β-dystroglycan (β-  
41 Dag) reveals no loss of dystroglycan protein in *fkrp* mutants (**a'**) compared to wildtype siblings  
42 (**a**). Quantitation in **a''** Wild Type (n=10) *fkrp*<sup>-/-</sup> (n=5). **b-b''**, Levels of glycosylated α-  
43 dystroglycan, which are dependent on FKRPs activity were assessed using I1H6 antibody  
44 immunoreactivity, Wild Type (n=12) *fkrp*<sup>-/-</sup> (n=6). **c-c''**, laminin antibody was used since  
45 laminin is glycosylated dystroglycans core binding partner, Wild Type (n=15) *fkrp*<sup>-/-</sup> (n=9). **a-**  
46 **c, a'-c'**, Lateral wholmount staining and confocal imaging of zebrafish myotomes centred on  
47 anal pore and z-projected from 10 optical slices. **a''-c''**, Box plots with 95% confidence  
48 interval, points outside plotted individually, **a''-b''**, maximum intensity quantitation,  
49 **\*\*\*(p<0.0001) \*\*(p<0.001), c''**, Full width half maximum analyses measured on Fiji image  
50 analysis software to quantitate the extent of laminin at vertical myosepta, **box represents 5-**  
51 **95%, median center line, whiskers = SEM.** **d**, Quantitation of fibre detachment events per  
52 myosepta analysed using two-way ANOVA multiple comparison assuming non-parametric  
53 data, box and whisker plot, middle line= mean, box= 95% confidence interval, **e**, Fibre crossing  
54 events per myosepta analysed using two-way ANOVA multiple comparison assuming non-  
55 parametric data. No significant difference was found by this analysis. **d-e**, error bars= SEM,  
56 points plotted outside 95% confidence interval, **box represents 5-95%, median center line,**  
57 **whiskers = SEM.** **f-f'**, Evans blue dye (EBD) injected 5dpf larvae, scale bar 50µm, reveals  
58 uptake globally in the vasculature and by a single muscle fiber (arrowhead, a marker of  
59 sarcolemma damage), but no other vascular leakage, wild type (n=12), *fkrp*<sup>-/-</sup> (n=5). **f'**, number  
60 of fibers per vertical myosepta, error bar= SEM 95% confidence interval, **Student unpaired T-**  
61 **test analysis.** **g-g''**, Angiography with fluorescent dextran injected into 5dpf larvae, scale bar  
62 50µm, **g**, wild type (n=15), **g'** *fkrp*<sup>-/-</sup> (n=7). **g''**, number of breaks per vertical myosepta

63 intersegmental vessel, error bar= SEM 95% confidence interval, Student unpaired T-test  
64 analysis, scale bar = 30µm.

65  
66  
67  
68  
69  
70  
71  
72  
73  
74  
75  
76  
77

### Retina Morphology at 5dpf

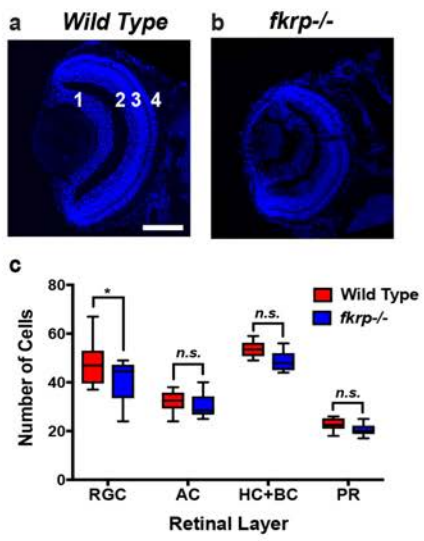

**Key:**  
 1. RGC: Retinal Ganglion Cell  
 2. AC: Amacrine Cell  
 3. HC+BC: Horizontal & Bipolar Cell  
 4. PR: Photoreceptor

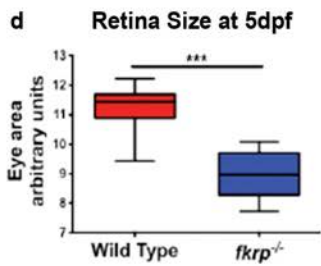

### Immunohistochemistry of the Retina at 5dpf

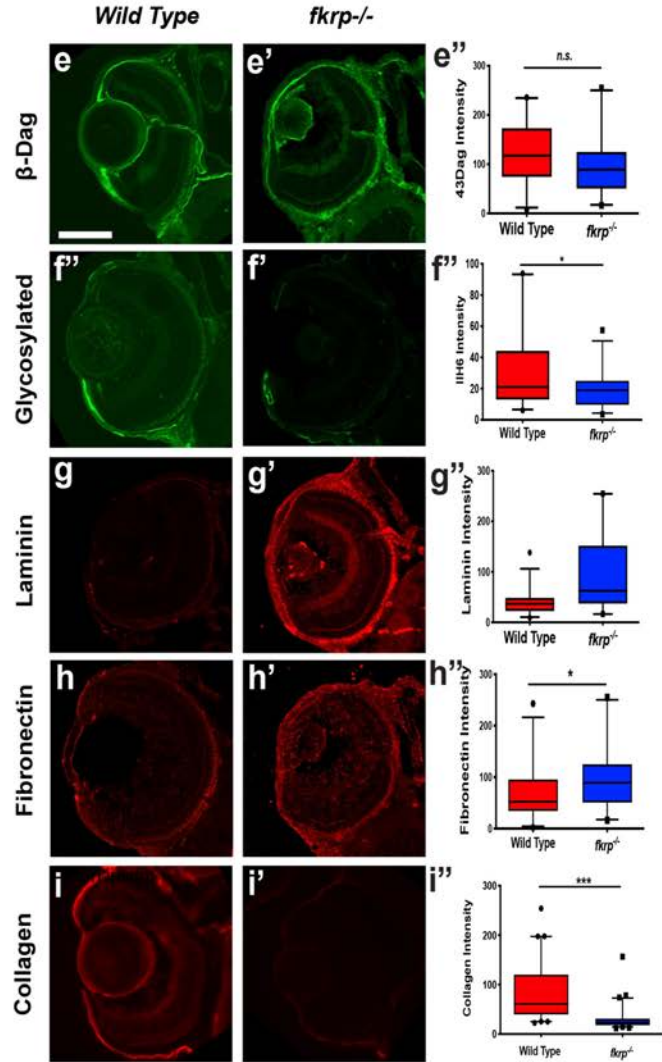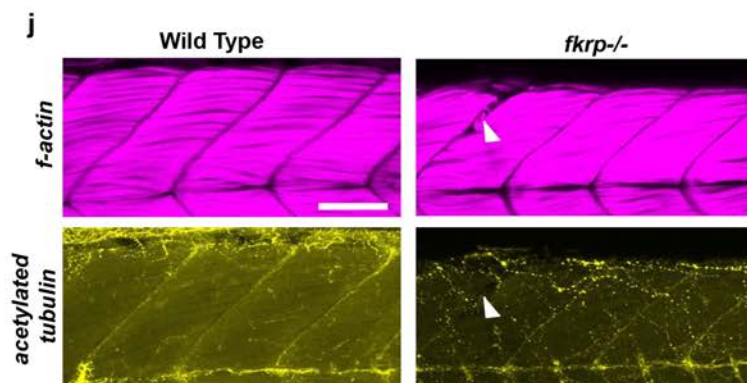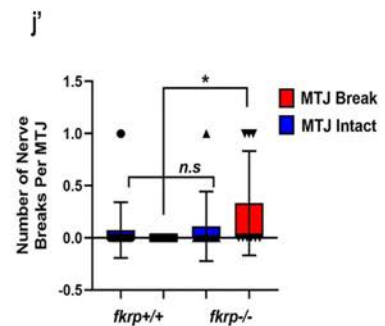

79 **Supplementary Figure 3: *fkrp*<sup>-/-</sup> mutant zebrafish recapitulate aspects of *FKRP* patient**  
80 **retinal phenotypes. a-d**, Characterisation of retinal defects in *fkrp*<sup>-/-</sup> larvae using DAPI to mark  
81 retinal nuclei. **a, b**, Transverse cross sections through 5dpf retinas at the level of optic nerve  
82 stained with DAPI. **a**, Wild type sibling, **b**, *fkrp*<sup>-/-</sup>. **c**, Quantification of the cellularity of different  
83 retinal layers in wild type sibling (red boxes) and *fkrp*<sup>-/-</sup> mutant retinas (blue boxes), \*(P<0.05),  
84 (n=10) from three repeats, box represents 5-95%, median center line, whiskers = SEM. **d**,  
85 Quantitation of the overall size of *fkrp*<sup>-/-</sup> mutant and wild type retinas. Eye area was calculated  
86 in Fiji image analysis software by using the external most basement membrane as a marker of  
87 eye size, calculated on pixels arbitrary units \*\*\*(p<0.0001), scale bar=100µm. **e-i** Evaluation  
88 of Dystrophin associated glycoprotein complex (DGC) deposition at the myosepta including:  
89 glycosylated dystroglycan levels with IIH6 antibody, (n=6) from three replicates. **e**,  
90 Wholemout immunohistochemistry staining for β-dsyroglycan (β-Dag) on the retina. **f**, pan-  
91 Laminin **g**, fibronectin **h**, collagen1a **i**. *fkrp*<sup>+/+</sup> wild type sibling no dash, *fkrp*<sup>-/-</sup> single dash (‘)  
92 and double dash (‘‘). **e-i**, Relative maximum intensity of staining at retina basement membranes:  
93 inner limiting membrane (closest to the lens) and Bruch’s membrane otherwise known as the  
94 external limiting membrane (exterior encapsulating membrane), three measurements spaced  
95 equally apart in each membrane were taken in each fish at each membrane, scale bar=100µm.  
96 **e-i**”” Box and whisker plot, middle line= mean, box= 95% confidence interval, error bars=  
97 SEM. **j-j’**, Neural staining for acetylated tubulin (yellow) and f-actin staining (purple) in 5dpf  
98 larvae, arrow marks MTJ defect and neuronal breaks/absence associated with this defect, scale  
99 bar 50µm, *fkrp*<sup>-/-</sup> n=3, *wild type* (n=9). **j’** Analysis of neuronal deficits at myotendinous  
100 junction fiber breaks and in the myotome, student unpaired T-test \*(p<0.05), error bars= 95%  
101 confidence interval SEM, scale bar = 50µm, (n=9) from three replicates.

102

103

104



105

106

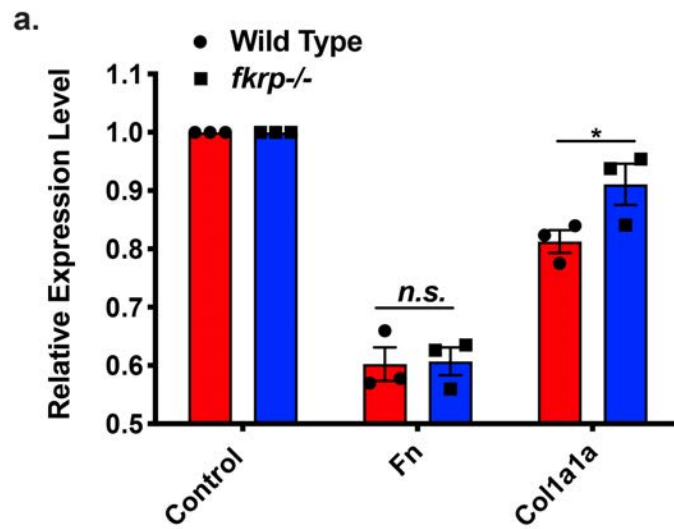

b.

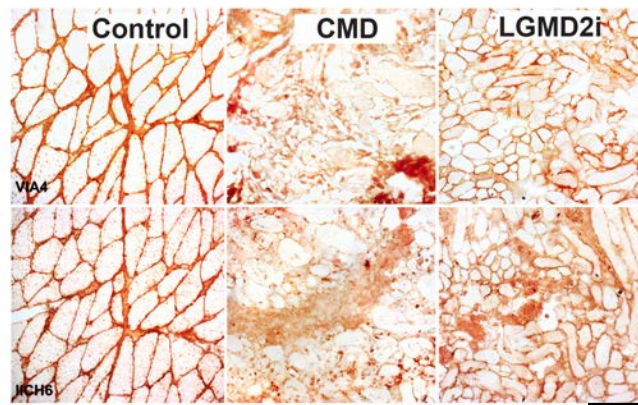

107

108 **Supplementary Figure 4: *collagen* but not *fibronectin* gene expression is upregulated in**

109 ***fkrp*<sup>-/-</sup> zebrafish. Glycosylation status of human cells on biopsy. a. Zebrafish *fibronectin***

110 **(*Fn*) and *collagen1a1a* (*Coll1a1a*) gene expression levels from qPCR experiments, student t-**

111 **test analysis between wild type and mutant, \*(p=<0.05), student unpaired T-test analysis, (n=3)**

112 **from three biological replicates and three technical replicates, average of technical data points**

113 **shown, error bars = SEM. b. Patient biopsies of skeletal muscle, immunoreactivity of  $\alpha$ -**

114 **dystroglycan glycosylation with ICH6 and VIA4 antibodies. Scale bar=100 $\mu$ m, representative**

115 **images from muscle biopsy at least three sections cut.**

116

## a: Fetuin O-glycans

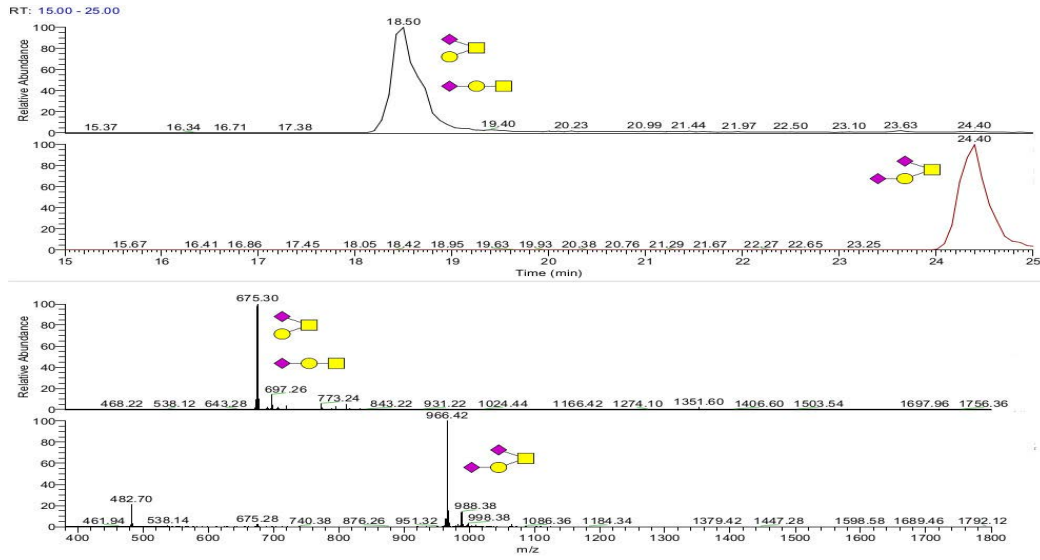

## b: Fibronectin O-glycans

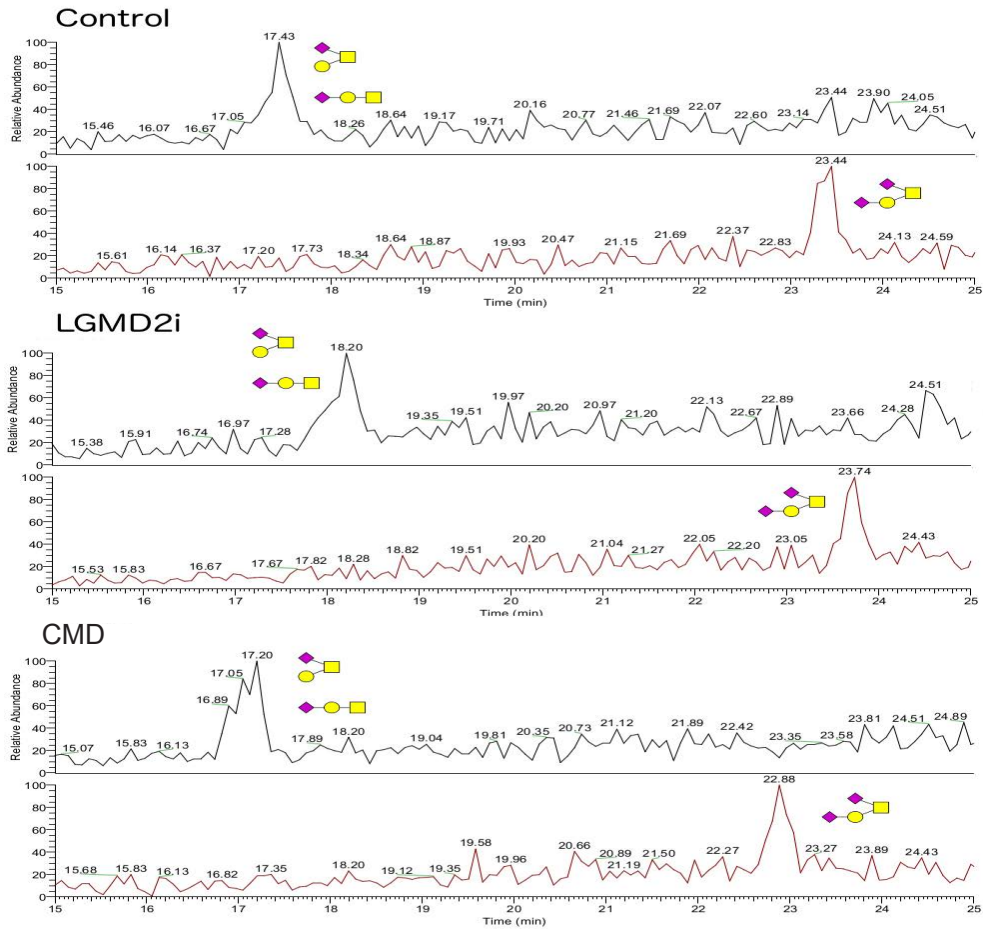

117

118

119 **Supplementary Figure 5: Fibronectin O-Glycans are not altered in *fkrp* patient myotubes.**  
120 LC *ms/ms* O-glycan composition of human cell fibronectin was determined in wild type  
121 control, LGMD2I, CMD human patient myotubes. **a**, Fetuin control analyses. Fetuin is a  
122 protein with a complete complement of *N* and *O* linked glycans that is commonly utilised for  
123 the standardisation of *ms/ms* glycan experiments<sup>22</sup>. This analysis demonstrates our technical  
124 ability to capture all relevant O-glycan signatures by LC *ms/ms*, **b**, fibronectin was  
125 immunoprecipitated from patient cells and O-glycans released by the process of beta-  
126 elimination of serine linked mucin type glycans. Three human cell lines were examined; control  
127 patient sample, LGMD2I patient cells and cells derived from a congenital muscular dystrophy  
128 patient. No significant changes in O-glycan signatures could be observed via LC *ms/ms*  
129 analysis of fibronectins released from these human patient cell lines.  
130

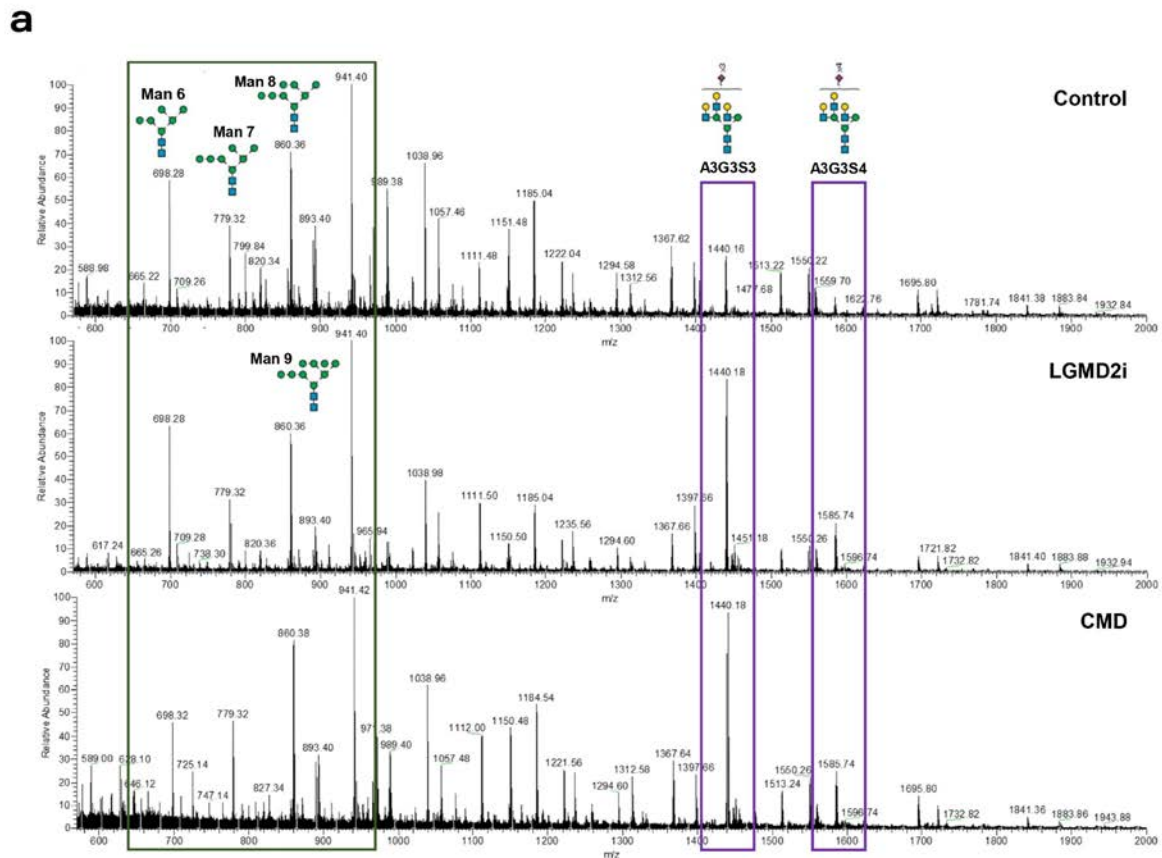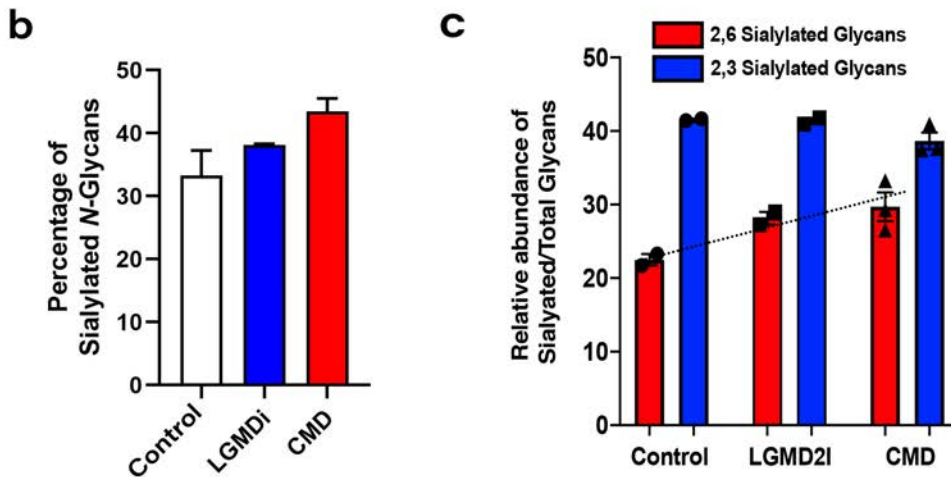

131

132 **Supplementary Figure 6: N-Glycan analyses do not reveal a global deficit in sialylation**

133 **in *FKRP* patient cells.** To determine if the alteration to sialylation was specific for *FKRP*

134 deficiency total cell lysates were examined for global sialylation levels. **a**, LC *ms/ms* N-glycan

135 composition of healthy control, LGMD2i and CMD cells were determined. The *ms/ms* glycan

136 analysis is presented graphically. Major peaks have been annotated with their predicted glycan

137 structure. The results reveal that there is no discernible difference in peak heights or pattern

138 between different genotypes. **b**, Relative levels of sialylated glycans analysed via a one-way  
139 ANOVA, average of three technical replicates only, error bars = SEM. **c**, Analysis of 2,3 vs  
140 2,6 sialylated glycans from the *ms/ms*, including a dotted trend line to indicate a general  
141 increase in 2,6 glycans in the patient samples<sup>55</sup>, average of three technical replicates data points  
142 shown, error bars = SEM.

143

### Neuraminadase Treated Fn-Collagen Binding

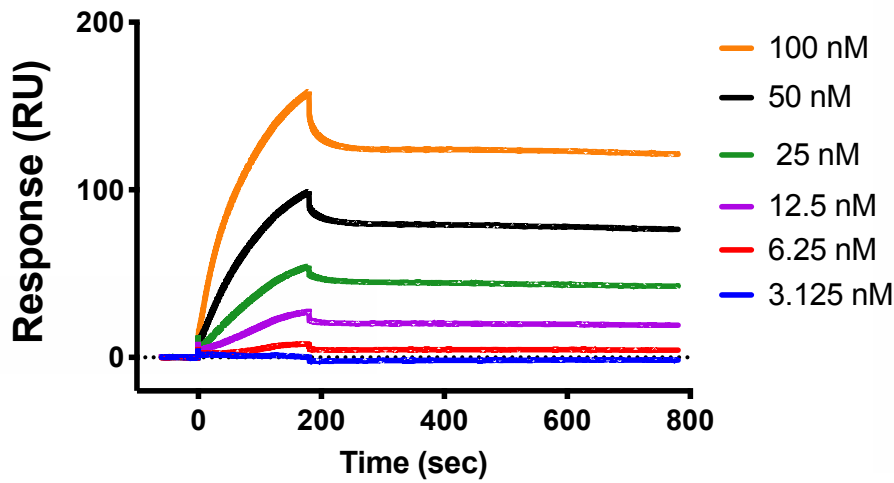

145

### 146 . Supplementary Figure 7: Dose response of neuraminidase-treated fibronectin-collagen

147 **binding.** Dose response curve for neuraminidase treated fibronectin (fibronectin

148 concentrations 100nM-3.125nM) with the resulting collagen binding response assayed via

149 Biacore analyses. Neuraminidase is an enzyme that removes sialic acid from the glycan

150 structures. This analysis provides a control dose response analysis for Fig 3d, revealing

151 that fibronectin binding status is not altered as collagen binding increases.

152

### a. Control vs LGMD2i

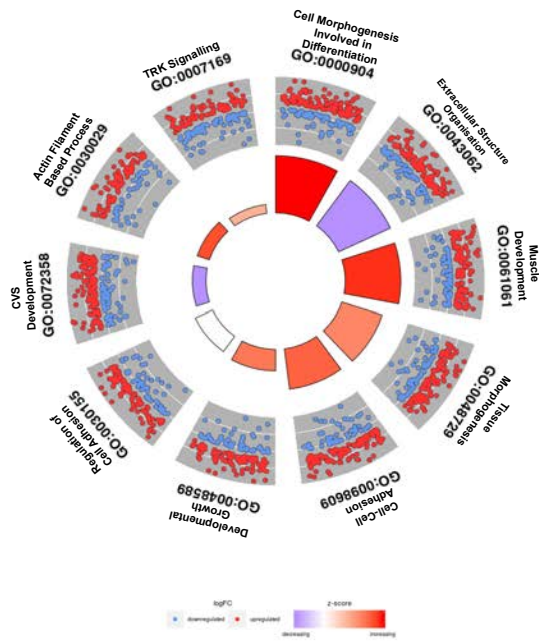

### b. Control vs CMD

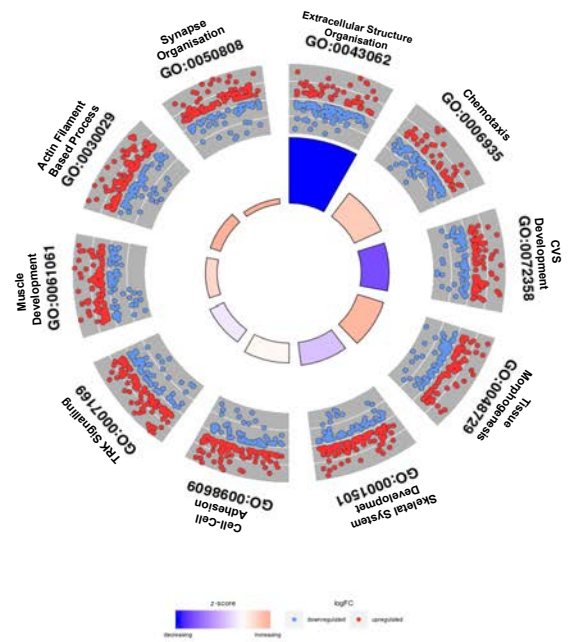

### c. Sialylation Pathway

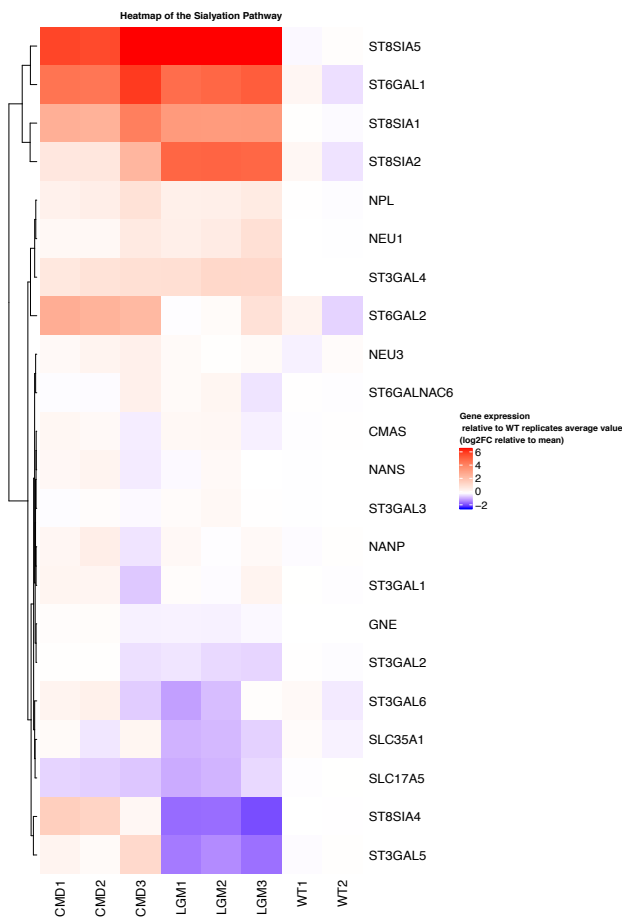

154 **Supplementary Figure 8: RNAseq analysis of LGMD2I and CMD patient cells.** Top 20  
155 enriched GO terms ordered by most changed pathway. **a**, Wild Type vs LGMD2I. **b**, Wild vs  
156 CMD. These analyses demonstrate that expected pathways are altered such as ECM  
157 organisation. **c**, sialylation pathway heatmap analysis. Heatmap analyses reveal that the  
158 sialylation genes responsible for addition of terminal sialic acid, such as *ST6GALI*,  
159 and sialyltransferases that specifically sialylate galactose at ternary glycan structures, are  
160 significantly upregulated rather than down regulated as might be hypothesised based on loss of  
161 fibronectin sialylation in patient cells.

162  
163



**a Myosin10 Pull Down: Fibronectin Detection (n=3)**

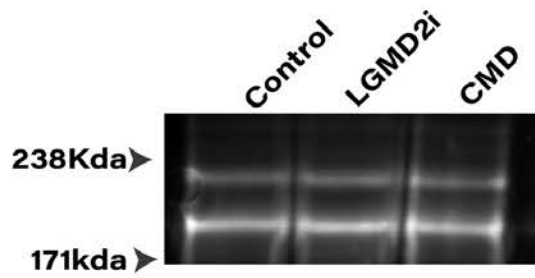

**b FKRP Pull Down: Myosin10 Detection (n=3)**

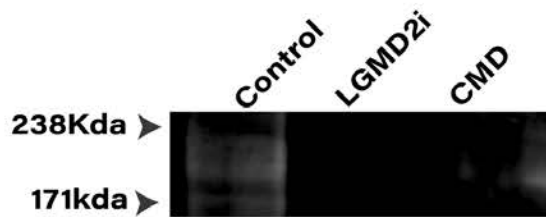

**c**

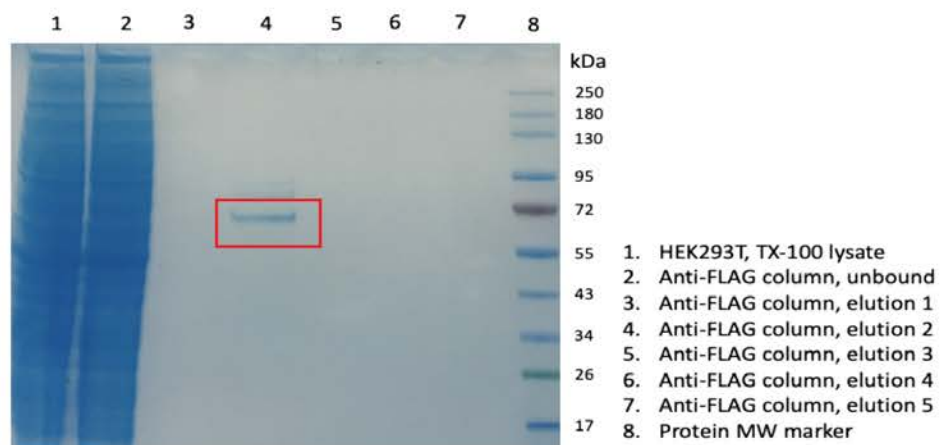

**d Fibronectin Sialylation Assay**

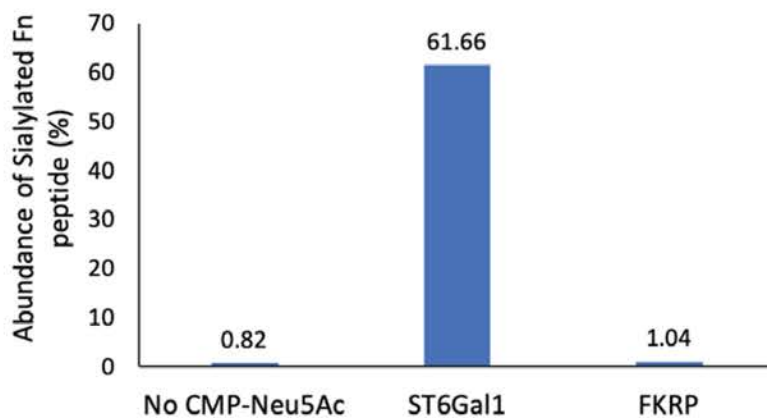

166 **Supplementary Figure 9: FKRP binds myosin10 and has no detectable sialylation activity**  
167 *in vitro*. **a**, Myosin10 co-immunoprecipitation of patient cell myotube membrane preparations,  
168 protein concentrations and volumes normalized prior to pull down. Fibronectin detected at  
169 approximately 220kda, two bands detected from the dimer in control, LGMD2I and CMD  
170 lysates (n=3). **b**, FKRP co-immunoprecipitation of patient cell myotube membrane  
171 preparations, concentrations and volumes normalized prior to pull down. Myosin10 detected  
172 at approximate 230kda in the control line and not detected in the LGMD2I and CMD membrane  
173 fractions (n=3). **c**, Purification of human FKRP-FLAG protein from over expression in  
174 HEK293T cells. Coomassie blue stain with see plus 2 marker, bands appear between 55-72kda  
175 (red box), repeated 3 times, the shown image is the cleanest of the blots. **d**, Purified FKRP  
176 protein was incubated with desialylated fibronectin and cmp-sialic acid substrate to examine if  
177 FKRP possessed any sialylation activity relative to the known sialylating enzyme ST6Gal1.  
178 Sialylation assay, calculated from *ms/ms* N-glycan analysis of fibronectin via determining the  
179 area under *ms/ms* peak for sialylated vs non sialyated glycans released from fibronectin. This  
180 reveals that recombinant ST6Gal1 can add sialic acids to fibronectin in this assay but  
181 recombinant FKRP protein cannot.  
182

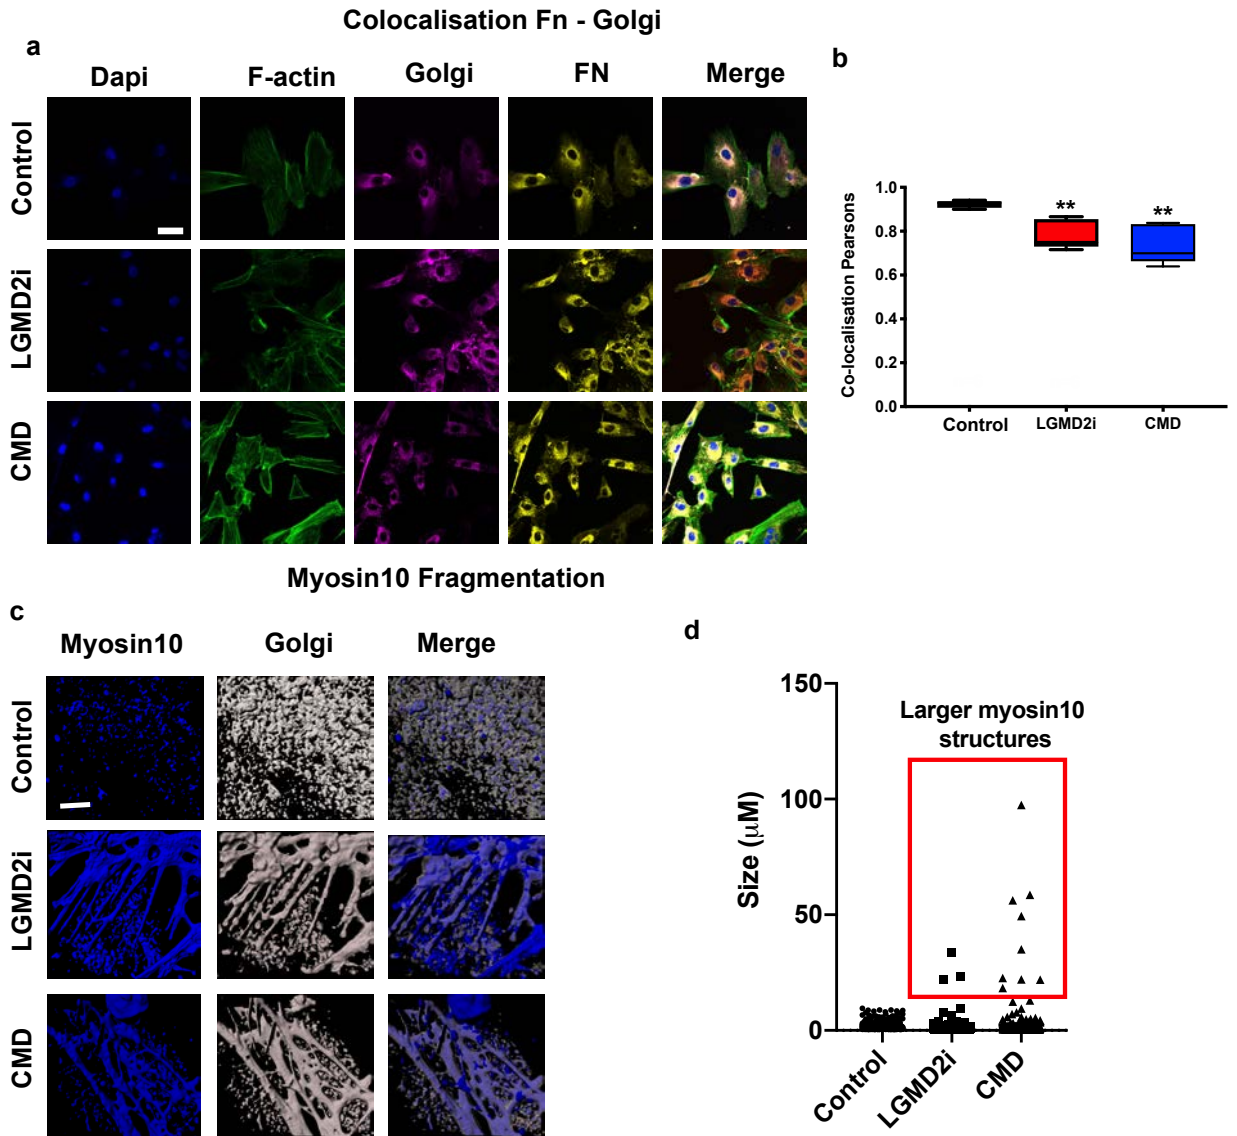

184

185 **Supplementary Figure 10: Fibronectin is not correctly localized to the Golgi in patient**  
 186 **cells. a**, Confocal analysis of fibronectin (Fn) localisation to the Golgi, with f-actin and DAPI  
 187 used as structural cellular markers ( $n=9$ ), scale bar =  $10\mu\text{m}$ . **b**, Pearson's co-localisation  
 188 analysis of fibronectin to the Golgi,  $** (p<0.001)$  ( $n=9$ ) analysed by one-way ANOVA, box  
 189 represents 5-95%, median center line, whiskers = SEM. **c**, Airyscan of trans-Golgi 3D rendered  
 190 in Imaris software, white 58k Golgi marker, blue myosin10, scale bar =  $2\mu\text{m}$ . **d**, Rendered,  
 191 volumes plotted to show fragmentation of myosin10 within the Golgi. Non-fragmented  
 192 Myosin10 is regarded to be non-functional. Its fragmentation in trans-Golgi is the mechanism  
 193 the Golgi uses to transport ECM components into the cytosol. The prevalence of larger

194 myosin10 structures (red box) specifically in patient myotubes indicates a defect in myosin10  
195 compartmentalisation within these cells.  
196

197

198 **Supplementary Table 1.**

| <b>Zebrafish</b> | <b>Forward</b>              | <b>Reverse</b>              |
|------------------|-----------------------------|-----------------------------|
| <b>Col1a1a</b>   | GAGGATGGTTGTACGTCGCA        | AGGTGCACCAACGTCCATAG        |
| <b>Col2a1a</b>   | TCCTGCTACTTGTGGCAACG        | GCTGGCCATCTTGAACACAG        |
| <b>FN</b>        | GTGCCACACACGTCTGAGTA        | GTGCCACACACGTCTGAGTA        |
| <b>zbact</b>     | CGAGCTGTCTTCCCATCC          | TCACCAACGTAGCTGTCTTTCT<br>G |
| <b>zrp113a</b>   | TCTGGAGGACTGTAAGAGGTAT<br>G | AGACGCACAATCTTGAGAGCA<br>G  |
| <b>ef1a</b>      | GCTGGCAAGGTCACAAAGTC        | GAACACGCCGCAACCTTTG         |

199

200

201
