# Supplementary material for: FKRP-dependent glycosylation of fibronectin regulates muscle pathology in muscular dystrophy
Source: PubMed Central journal article supplement (PMC8134429; doi:10.1038/s41467-021-23217-6), 2021-05-19
Supplement: 41467_2021_23217_MOESM5_ESM.pdf [file 41467_2021_23217_MOESM5_ESM.pdf]

## Reporting Summary

Nature Research wishes to improve the reproducibility of the work that we publish. This form provides structure for consistency and transparency in reporting. For further information on Nature Research policies, see [Authors & Referees](#) and the [Editorial Policy Checklist](#).

### Statistics

For all statistical analyses, confirm that the following items are present in the figure legend, table legend, main text, or Methods section.

n/a Confirmed

- |                                     |                                     |                                                                                                                                                                                                                                                            |
|-------------------------------------|-------------------------------------|------------------------------------------------------------------------------------------------------------------------------------------------------------------------------------------------------------------------------------------------------------|
| <input type="checkbox"/>            | <input checked="" type="checkbox"/> | The exact sample size ( $n$ ) for each experimental group/condition, given as a discrete number and unit of measurement                                                                                                                                    |
| <input type="checkbox"/>            | <input checked="" type="checkbox"/> | A statement on whether measurements were taken from distinct samples or whether the same sample was measured repeatedly                                                                                                                                    |
| <input type="checkbox"/>            | <input checked="" type="checkbox"/> | The statistical test(s) used AND whether they are one- or two-sided<br><i>Only common tests should be described solely by name; describe more complex techniques in the Methods section.</i>                                                               |
| <input type="checkbox"/>            | <input checked="" type="checkbox"/> | A description of all covariates tested                                                                                                                                                                                                                     |
| <input type="checkbox"/>            | <input checked="" type="checkbox"/> | A description of any assumptions or corrections, such as tests of normality and adjustment for multiple comparisons                                                                                                                                        |
| <input type="checkbox"/>            | <input checked="" type="checkbox"/> | A full description of the statistical parameters including central tendency (e.g. means) or other basic estimates (e.g. regression coefficient) AND variation (e.g. standard deviation) or associated estimates of uncertainty (e.g. confidence intervals) |
| <input type="checkbox"/>            | <input checked="" type="checkbox"/> | For null hypothesis testing, the test statistic (e.g. $F$ , $t$ , $r$ ) with confidence intervals, effect sizes, degrees of freedom and $P$ value noted<br><i>Give <math>P</math> values as exact values whenever suitable.</i>                            |
| <input checked="" type="checkbox"/> | <input type="checkbox"/>            | For Bayesian analysis, information on the choice of priors and Markov chain Monte Carlo settings                                                                                                                                                           |
| <input checked="" type="checkbox"/> | <input type="checkbox"/>            | For hierarchical and complex designs, identification of the appropriate level for tests and full reporting of outcomes                                                                                                                                     |
| <input type="checkbox"/>            | <input checked="" type="checkbox"/> | Estimates of effect sizes (e.g. Cohen's $d$ , Pearson's $r$ ), indicating how they were calculated                                                                                                                                                         |

*Our web collection on [statistics for biologists](#) contains articles on many of the points above.*

### Software and code

Policy information about [availability of computer code](#)

Data collection All microscope systems, mass spectroscopy and biacore were controlled by the company specific proprietary acquisition software.

Data analysis  
Image analysis- Fiji and Imaris 9.2 (Bitplane).  
Statistical analysis- Prism version 7.0c (GraphPad Software, Inc.).  
Metascape  
GOplot (2, v1.0.2  
Microsoft Excel V 14.4.6  
Adobe photoshop 2020 V 21.1.2  
Adobe illustrator CC 2018 V 22.1.0  
Adobe premier pro 2020 V 14.1

For manuscripts utilizing custom algorithms or software that are central to the research but not yet described in published literature, software must be made available to editors/reviewers. We strongly encourage code deposition in a community repository (e.g. GitHub). See the Nature Research [guidelines for submitting code & software](#) for further information.

### Data

Policy information about [availability of data](#)

All manuscripts must include a [data availability statement](#). This statement should provide the following information, where applicable:

- Accession codes, unique identifiers, or web links for publicly available datasets
- A list of figures that have associated raw data
- A description of any restrictions on data availability

<https://glycopost.glycosmos.org/preview/15008940036038edf6af4e9>

(PIN CODE: 4292)

The GEO accession number for RNA-seq experiment is GSE163213 NCBI Gene Expression Omnibus

## Field-specific reporting

Please select the one below that is the best fit for your research. If you are not sure, read the appropriate sections before making your selection.

Life sciences  Behavioural & social sciences  Ecological, evolutionary & environmental sciences

For a reference copy of the document with all sections, see [nature.com/documents/nr-reporting-summary-flat.pdf](https://www.nature.com/documents/nr-reporting-summary-flat.pdf)

## Life sciences study design

All studies must disclose on these points even when the disclosure is negative.

|                 |                                                                                                                                                                                                                                                                                                                                                                   |
|-----------------|-------------------------------------------------------------------------------------------------------------------------------------------------------------------------------------------------------------------------------------------------------------------------------------------------------------------------------------------------------------------|
| Sample size     | No statistical methods were used to predetermine sample sizes. Sample sizes was chosen based on previous experience and standards in the field. Sufficient sample sizes were chosen for each experiment to determine whether the outcome was statistically significant.                                                                                           |
| Data exclusions | We excluded one replicate from our RNA seq analysis that failed stringency analysis                                                                                                                                                                                                                                                                               |
| Replication     | Experiments in fish were repeated in triplicate both technical and biological replicates as a minimum. Human samples were limited to technical replicates but ran in triplicates. We had one failed replicate on glycan mass spectroscopy analysis due to a technical error within the mass spec and excluded the result because it was not calibrated correctly. |
| Randomization   | For general experiments and treatments of zebrafish larvae - larvae from several clutches were pooled and randomly allocated into groups.                                                                                                                                                                                                                         |
| Blinding        | All fish experiments were run blind by analysis all samples before genotyping the fish. All biochemistry was blinded before passing to our colleagues in Sydney for ms/ms analysis. Imaging of cells was carried out blinded by our imaging facility.                                                                                                             |

## Reporting for specific materials, systems and methods

We require information from authors about some types of materials, experimental systems and methods used in many studies. Here, indicate whether each material, system or method listed is relevant to your study. If you are not sure if a list item applies to your research, read the appropriate section before selecting a response.

### Materials & experimental systems

| n/a                                 | Involved in the study                                           |
|-------------------------------------|-----------------------------------------------------------------|
| <input type="checkbox"/>            | <input checked="" type="checkbox"/> Antibodies                  |
| <input type="checkbox"/>            | <input checked="" type="checkbox"/> Eukaryotic cell lines       |
| <input checked="" type="checkbox"/> | <input type="checkbox"/> Palaeontology                          |
| <input type="checkbox"/>            | <input checked="" type="checkbox"/> Animals and other organisms |
| <input type="checkbox"/>            | <input checked="" type="checkbox"/> Human research participants |
| <input checked="" type="checkbox"/> | <input type="checkbox"/> Clinical data                          |

### Methods

| n/a                                 | Involved in the study                           |
|-------------------------------------|-------------------------------------------------|
| <input checked="" type="checkbox"/> | <input type="checkbox"/> ChIP-seq               |
| <input checked="" type="checkbox"/> | <input type="checkbox"/> Flow cytometry         |
| <input checked="" type="checkbox"/> | <input type="checkbox"/> MRI-based neuroimaging |

## Antibodies

Antibodies used

Primaries:  
fkrp: rabbit polyclonal 1:500 Invitrogen custom service (C + NPQYPNPAKKRLDRSR; 517-530)  
1:500, Beta-Tubulin- Loading Control 50kda, IgG rabbit AbCam: ab6046, 1:10,000,  
43DAG anti  $\beta$ -DG mouse IgG 1:50; Novocastra now Leica biosystems: PRODUCT ID: BETA-DYSTROGLYCAN,  
IIH6 anti  $\alpha$ -DG mouse IgM 1:50 Merc: 05-593)  
pan-laminin anti rabbit IgG polyclonal 1:100; Sigma: L9393  
Fibronectin rabbit 1:200; Sigma F3648  
Fibronectin mouse 1:250, abcam 2413  
Collagen1 rabbit, Abcam, 1:100: ab34710  
Golgi 58k Goat polyclonal ab23932.  
Anti-non-muscle Myosin IIB/MYH10 antibody [3H2] ab684,GORASP  
Secondaries:  
Goat anti-mouse IgM Alexa Fluor 594: Invitrogen; A-21044, 1:500  
Goat anti-mouse IgG Alexa Fluor 594, Invitrogen; A-21125, 1:500  
Donkey anti-rabbit IgG Fluor 594, Invitrogen; 1:500  
Alexa488 (Invitrogen: 1:250),  
IRDye 800CW goat anti rabbit LI-COR: 926-32211, 1/5,000.

goat anti mouse IgG Abberior580 1:250  
Goat anti rabbit IgG Abberior635 1:250.

## Validation

### List of Validation:

Fkrp: Kawahara, G., Guyon, J. R., Nakamura, Y. & Kunkel, L. M. Zebrafish models for human FKRP muscular dystrophies. *Hum Mol Genet* 19, 623-633, doi:10.1093/hmg/ddp528 (2010).

Beta Tubulin: <https://www.abcam.com/beta-tubulin-antibody-loading-control-ab6046-references.html#top-1033> 600 references

IRD licor: <https://www.licor.com/bio/reagents/irdye-800cw-infrared-dyes>

43Dag: <https://shop.leicabiosystems.com/us/ihc-ish/ihc-primary-antibodies/pid-beta-dystroglycan>

IIH6: [http://www.merckmillipore.com/AU/en/product/Anti-Dystroglycan-Antibody-clone-IIH6C4,MM\\_NF-05-593](http://www.merckmillipore.com/AU/en/product/Anti-Dystroglycan-Antibody-clone-IIH6C4,MM_NF-05-593) Membrane organization of the dystrophin-glycoprotein complex.

Ervasti, J M and Campbell, K P

*Cell*, 66: 1121-31 (1991) 1991

Laminin: <https://www.sigmaaldrich.com/catalog/product/sigma/I9393?lang=en&region=AU> Basement membrane-like structures containing NTH  $\alpha 1$ (IV) are formed around the endothelial cell network in a novel in vitro angiogenesis model.

Yongchol Shin et. al

*American journal of physiology. Cell physiology*, 317(2), undefined (2019-6-13)

collagen1:RGD inhibition of itgb1 ameliorates laminin-  $\alpha 2$ -deficient zebrafish fibre pathology

Alasdair J Wood, Naomi Cohen, Veronica Joshi, Mei Li, Adam Costin, Lucy Hersey, Emily A McKaige, Jessica D Manneken, Carmen Sonntag, Lee B Miles ... Show more

*Human Molecular Genetics*, Volume 28, Issue 9, 1 May 2019, Pages 1403–1413, <https://doi.org/10.1093/hmg/ddy426>

Myosin IIb/MYH10 antibody: Müller A et al. Actin stress fiber dynamics in laterally confined cells. *Integr Biol (Camb)* 11:175-185 (2019).

Golgi58k:Hofhuis J et al. Dysferlin mediates membrane tubulation and links T-tubule biogenesis to muscular dystrophy. *J Cell Sci* 130:841-852 (2017).

Secondaries were all well established antibodies.

All other primary antibodies were validated by the supplier for the purpose used in this manuscript.

If an antibody had not previously been tested in larval zebrafish tissue, its antibody expression pattern during developmental stages was compared to its in situ expression patterns to see if protein localisation corresponded to where its RNA transcripts were present.

## Eukaryotic cell lines

Policy information about [cell lines](#)

Cell line source(s)

European Biobank: HEK293 were obtained from Sigma-Aldrich (Catalogue #:85120602)

Authentication

Lines were identified by genotype and immunohistochemistry analysis with IIH6 antibody

Mycoplasma contamination

All lines tested negative for Mycoplasma.

Commonly misidentified lines  
(See [CLAC](#) register)

No commonly miss identified lines were used in study. ILAC search performed.

## Animals and other organisms

Policy information about [studies involving animals](#); [ARRIVE guidelines](#) recommended for reporting animal research

Laboratory animals

Danio Rerio Zebrafish were used 1-7 days post fertilization, mixed gender. Adults fro breeding were kept upto 2 years of age strains used were TU wild type all transgenic and mutant lines were generated from TU strain.

Wild animals

Study did not involve wild animals.

Field-collected samples

Study did not involve samples collected from the field.

Ethics oversight

Monash Animal Ethics Committee

Note that full information on the approval of the study protocol must also be provided in the manuscript.

## Human research participants

Policy information about [studies involving human research participants](#)

Population characteristics

Infantile and adult patients affected with neuromuscular diseases, undergoing muscle biopsies for diagnostic purposes., at the Carlo Besta Neurological Institute, Milan, Italy.

Recruitment

Patients were recruited at the Carlo Besta Neurological Institute after informed patient / parental consent and in compliance with the Italian law. Samples were deposited, with informed consent, in the biobank "Cells, tissues and DNA from patients with neuromuscular diseases" for future studies.

Ethics oversight

Investigations on human tissue were approved by the Besta Institute review board and were in accordance with Italian law. Research on the cell lines obtained from the Carlo Besta Neurological Institute, at Monash University was conducted with ethical oversight and review via the Monash University Human Research Ethics Committee project number CF14/3369 - 2014001793

Note that full information on the approval of the study protocol must also be provided in the manuscript.
